# Supplementary material for: Mutation of N-glycosylation Sites in Salmonid Alphavirus (SAV) Envelope Proteins Attenuate the Virus in Cell Culture
Source: MDPI journal article supplement (doi:10.3390/v12101071), 2020-09-24
Supplement: s1 [file s1]

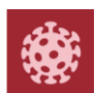

A

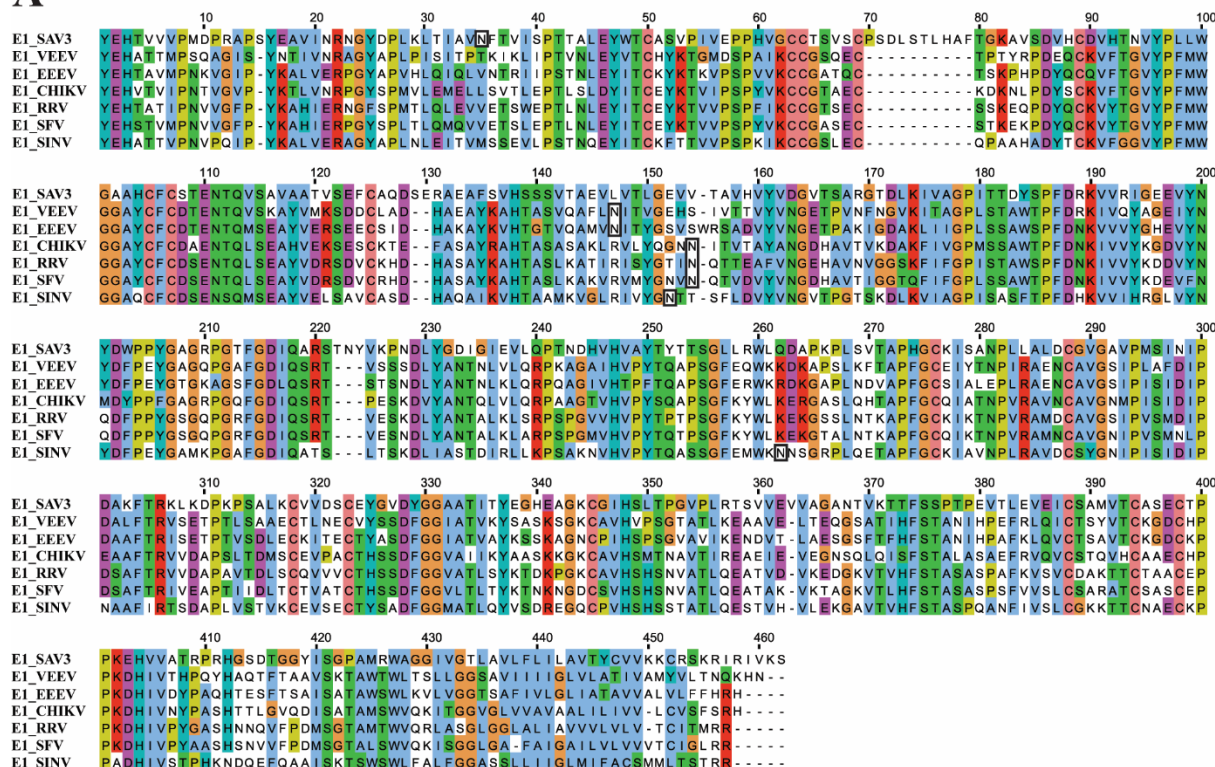

B

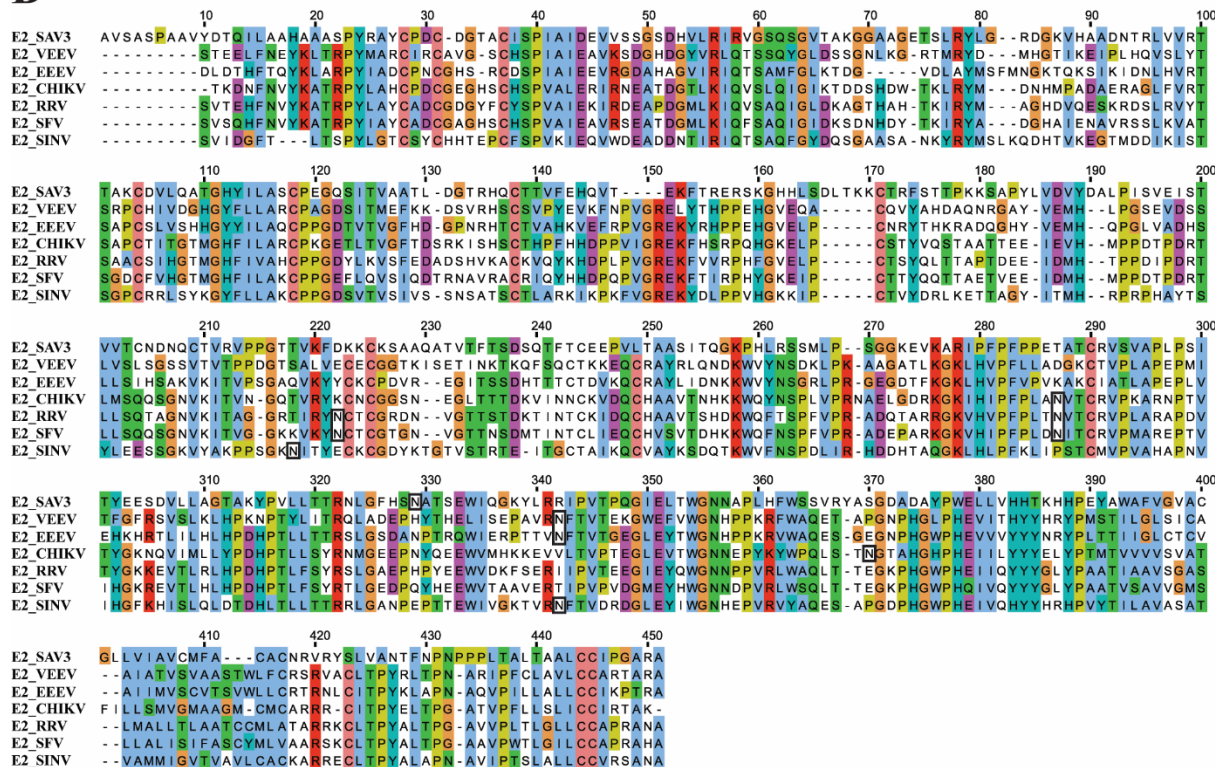

1

2

3

4

5

**Figure S1.** Multiple sequence alignments of the A1 and B) E2 protein sequences from SAV3 and the alphaviruses Venezuelan equine encephalitis virus (VEEV) (3J0C\_A/B, P09592 (like)), Eastern equine encephalitis virus (EEEV) (ANB41743), Chikungunya virus (CHIKV) (AEA10291), Ross river virus (RRV) (P08491), Semliki forest virus (SFV) (NP\_819008, NP\_819006) and Sinbis virus (SINV)

(CAA24684). The predicted N-glycosylation sites for SAV E1 and E2, and those from the other alphaviruses, are shown in black boxes. Dotted lines in bold indicate sequence sections removed for display purposes.

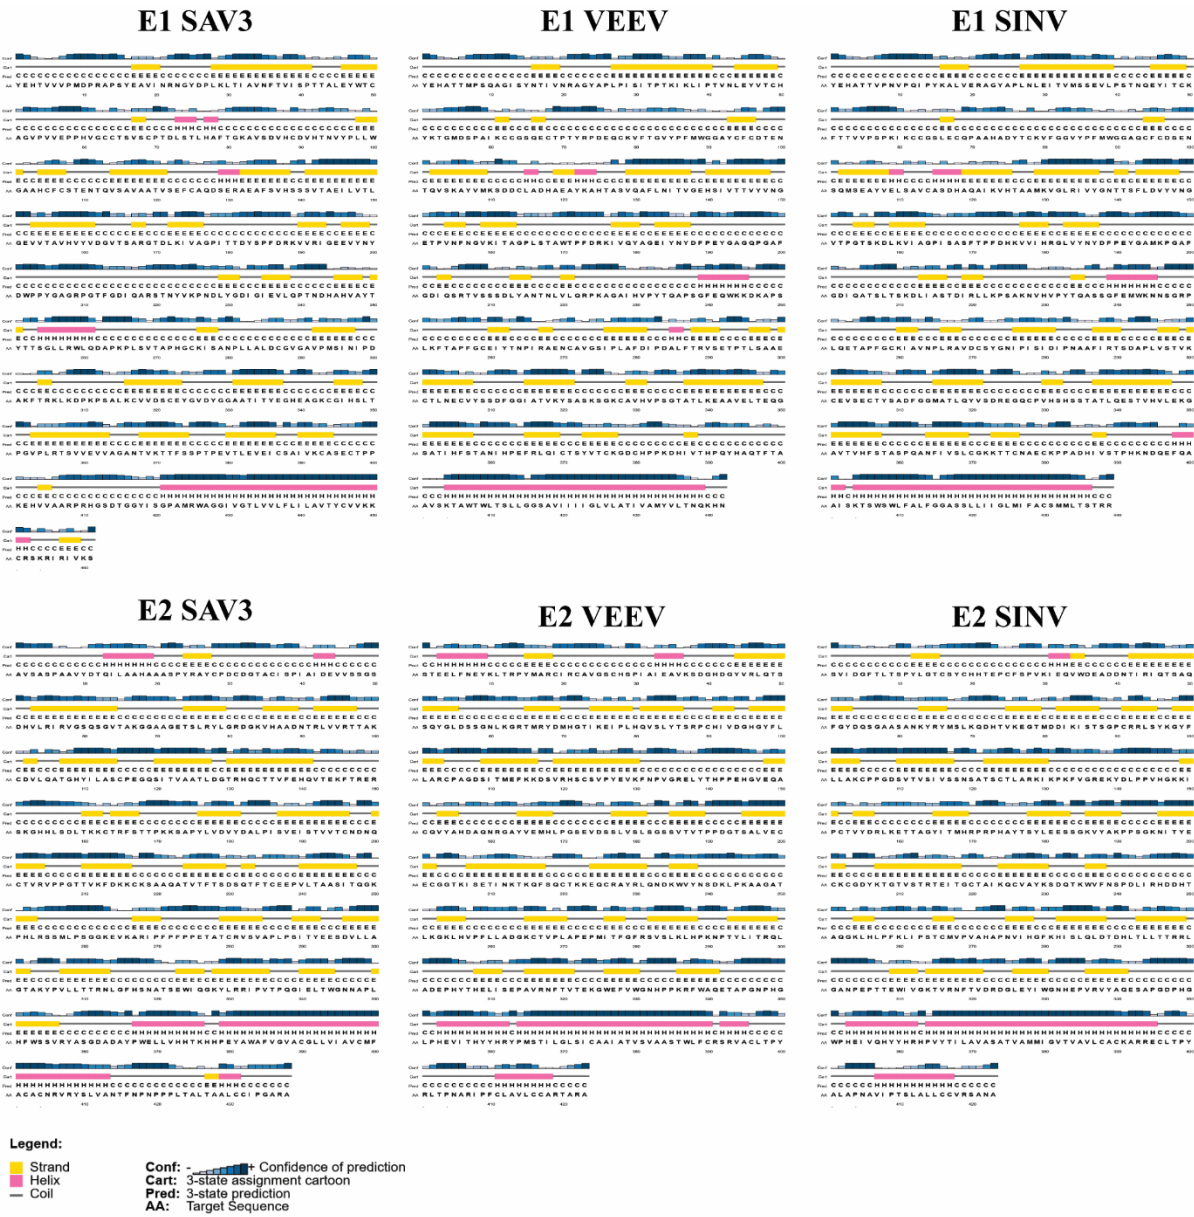

**Figure S2.** PSIPRED secondary structure predictions of **A** E1 and **B** E2 from SAV3 and the alphaviruses Venezuelan equine encephalitis virus (VEEV) (3J0C\_A/B, P09592 and Sinbid virus (SINV) (CAA24684).

**Table S1.** Pairwise amino acid sequence identities (above diagonal) and similarities (below diagonal) between E1 from SAV3 and selected alphaviruses (%).

|       | SAV3 | VEEV | EEEV | CHIKV | RRV  | SFV  | SINV |
|-------|------|------|------|-------|------|------|------|
| SAV3  | -    | 38.2 | 40.0 | 37.4  | 38.8 | 39.7 | 39.4 |
| VEEV  | 49.3 | -    | 60.1 | 50.8  | 52.3 | 51.4 | 50.3 |
| EEEV  | 50.8 | 70.5 | -    | 51.7  | 54.6 | 56.6 | 52.8 |
| CHIKV | 49.4 | 64.0 | 65.1 | -     | 60.5 | 61.2 | 46.7 |
| RRV   | 50.0 | 62.3 | 66.9 | 71.9  | -    | 77.9 | 50.9 |
| SFV   | 49.3 | 60.5 | 67.4 | 71.9  | 86.5 | -    | 49.3 |

|      |      |      |      |      |      |      |   |
|------|------|------|------|------|------|------|---|
| SINV | 50.6 | 60.4 | 62.6 | 57.4 | 59.8 | 58.7 | - |
|------|------|------|------|------|------|------|---|

**Table S2.** Pairwise amino acid sequence identities (above diagonal) and similarities (below diagonal) between E2 from SAV3 and selected alphaviruses (%).

|       | SAV3 | VEEV | EEEV | CHIKV | RRV  | SFV  | SINV |
|-------|------|------|------|-------|------|------|------|
| SAV3  | -    | 27.2 | 28.3 | 29.5  | 28.2 | 26.8 | 25.8 |
| VEEV  | 38.3 | -    | 48.1 | 36.1  | 38.9 | 36.0 | 40.7 |
| EEEV  | 38.1 | 59.0 | -    | 40.5  | 40.5 | 39.0 | 43.8 |
| CHIKV | 42.0 | 49.6 | 52.4 | -     | 56.3 | 57.5 | 35.6 |
| RRV   | 38.9 | 49.8 | 53.6 | 65.6  | -    | 69.2 | 40.8 |
| SFV   | 37.9 | 48.1 | 51.0 | 66.5  | 78.4 | -    | 39.6 |
| SINV  | 37.4 | 50.8 | 56.0 | 46.3  | 51.2 | 49.1 | -    |

**Table S3.** Ct values following recovery of viral RNA in CHH-1 supernatant after infection with SAV3 with mutation in N-glycosylation sites in E1 and E2.

| Virus                                      | Passage number |      |      |       |       |
|--------------------------------------------|----------------|------|------|-------|-------|
|                                            | P0             | P1   | P2   | P3    | P4    |
| rSAV3 E1 <sub>35Q</sub>                    | 21.4           | 29.5 | 35.5 | no Ct | no Ct |
| rSAV3 E1 <sub>35A</sub>                    | 22.9           | 26.5 | 31.5 | no Ct | no Ct |
| rSAV3 E1 <sub>35Q</sub> E2 <sub>319Q</sub> | 22.2           | 27.1 | 32.3 | no Ct | no Ct |
| rSAV3 E1 <sub>35A</sub> E2 <sub>319A</sub> | 21.8           | 26.1 | 30.7 | 30.2  | no Ct |
| rSAV3                                      | 24.9           | 23.3 | 20.1 | 22.1  | 23.1  |
| rSAV E2 <sub>319Q</sub>                    | 22.8           | 21.7 | 18.2 | 18.3  | 24.7  |
| rSAV E2 <sub>319A</sub>                    | 18.7           | 23.9 | 19.1 | 19.4  | 21.5  |

Assays were repeated for constructs containing mutations in E1 to verify pattern of decreasing Ct-values with no Cts at P4. Sanger sequencing on RNA isolated from P4 confirmed that the mutations in rSAV E2<sub>319Q</sub> and rSAV E2<sub>319A</sub> were intact.

**Table S4.** Cytopathic effect in CHH-1 cells infected rSAV3, rSAV3 E2<sub>319Q</sub> and rSAV3 E2<sub>319A</sub> as measured by total RNA concentration (ng/μL) in adherent cells.

| Virus                   | 4 hpi |     | 24 hpi |     | 3 dpi |     | 7 dpi |     | 9 dpi |     | 14 dpi |     |
|-------------------------|-------|-----|--------|-----|-------|-----|-------|-----|-------|-----|--------|-----|
|                         | #1    | #2  | #1     | #2  | #1    | #2  | #1    | #2  | #1    | #2  | #1     | #2  |
| rSAV3                   | 175   | 157 | 202    | 193 | 287   | 285 | 181   | 211 | 134   | 142 | 47     | 65  |
| rSAV E2 <sub>319Q</sub> | 169   | 165 | 155    | 196 | 331   | 284 | 326   | 210 | 322   | 248 | 256    | 305 |
| rSAV E2 <sub>319A</sub> | 153   | 184 | 143    | 186 | 278   | 263 | 326   | 212 | 232   | 308 | 267    | 309 |

Biological parallels (well #) for each virus at each timepoint. hpi=hours post infection, dpi= days post infection. Total RNA concentration in ng/μL.

**Table S5.** Viral Ct values of CHH-1 cells infected with rSAV3, rSAV3 E2<sub>319Q</sub> and rSAV3 E2<sub>319A</sub>

| Virus                   | 4 hpi |      | 12 hpi |      | 24 hpi       |              | 3 dpi |      | 7 dpi |      | 9 dpi |      | 14 dpi |      |
|-------------------------|-------|------|--------|------|--------------|--------------|-------|------|-------|------|-------|------|--------|------|
|                         | #1    | #2   | #1     | #2   | #1           | #2           | #1    | #2   | #1    | #2   | #1    | #2   | #1     | #2   |
| rSAV3                   | 32.7  | 33.0 | 31.7   | 33.6 | <i>no Ct</i> | <i>no Ct</i> | 19.3  | 20.5 | 19.8  | 17.8 | 29.4  | 13.4 | 18.8   | 20.2 |
|                         | 32.2  | 32.8 | 31.8   | 33.7 | <i>no Ct</i> | 27.6         | 19.2  | 20.3 | 19.8  | 18.0 | 29.8  | 13.5 | 18.2   | 19.8 |
|                         | -     | -    | -      | -    | <i>no Ct</i> | 27.4         | -     | -    | -     | -    | -     | -    | -      | -    |
|                         | -     | -    | -      | -    | <i>no Ct</i> | 27.7         | -     | -    | -     | -    | -     | -    | -      | -    |
|                         | -     | -    | -      | -    | <i>no Ct</i> | 25.9         | -     | -    | -     | -    | -     | -    | -      | -    |
|                         | -     | -    | -      | -    | <i>no Ct</i> | 25.8         | -     | -    | -     | -    | -     | -    | -      | -    |
| rSAV E2 <sub>319Q</sub> | 35.0  | 33.4 | 33.0   | 34.0 | 27.9         | 27.4         | 21.7  | 20.5 | 18.4  | 19.5 | 15.2  | 14.5 | 22.7   | 24.2 |
|                         | 35.9  | 33.7 | 33.0   | 33.6 | 27.9         | 27.8         | 21.5  | 20.6 | 18.4  | 19.3 | 15.0  | 14.7 | 22.7   | 24.2 |
| rSAV E2 <sub>319A</sub> | 33.0  | 32.8 | 31.9   | 32.8 | 27.4         | 26.9         | 21.5  | 20.4 | 20.6  | 18.7 | 13.3  | 16.1 | 24.7   | 24.9 |
|                         | 33.0  | 32.7 | 31.7   | 33.0 | 27.1         | 27.0         | 21.4  | 20.1 | 20.5  | 18.7 | 12.9  | 16.2 | 24.8   | 25.0 |

Biological (well #) and PCR parallels for each virus at each timepoint. hpi=hours post infection, dpi= days post infection. Data in italics have not been included in Figure. 7. See main text for more details.
